# Supplementary material for: High specific surface area LaMO3(M = Co, Mn) hollow spheres: synthesis, characterization and catalytic properties in methane combustion
Source: Royal Society of Chemistry journal article supplement (doi:10.1039/c4ra10053k), 2014-01-01
Supplement: c4ra10053k1.pdf [file c4ra10053k1.pdf]

Electronic Supplementary Information (ESI)

**High surface area LaMO<sub>3</sub> (M=Co, Mn) hollow spheres:  
synthesis, characterization and catalytic properties in  
methane combustion**

Guangsheng Guo, Kuo Lian, Lijuan Wang, Fubo Gu\*, Dongmei Han, Zhihua Wang\*

*State Key Laboratory of Chemical Resource Engineering, Beijing University of Chemical*

*Technology, Beijing, 100029, China*

\* Authors to whom correspondence should be addressed:

Prof. Fubo Gu (F. B. Gu)

E-mail: gufb@mail.buct.edu.cn,

Tel. No.: +86 10 64445927

Prof. Zhihua Wang (Z. H. Wang)

E-mail: zhwang@mail.buct.edu.cn,

Tel. No.: +86 10 64445927

**Content**

---

| <b>Item</b> | <b>Page</b> |
|-------------|-------------|
| S1          | 3           |
| S2          | 4           |
| S3          | 5           |
| S4          | 6           |
| S5          | 7           |
| S6          | 8           |
| S7          | 9           |
| S8          | 10          |

---

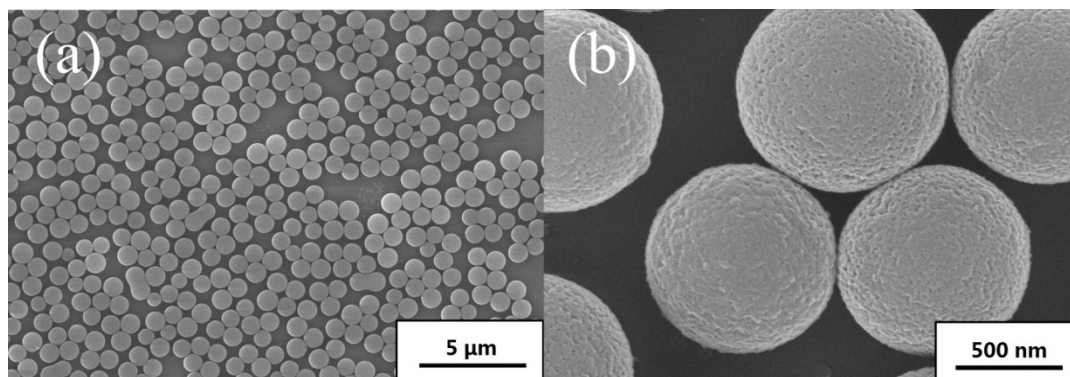

**Figure S1.** SEM images of carbon sphere templates: (a) low magnification; (b) high magnification.

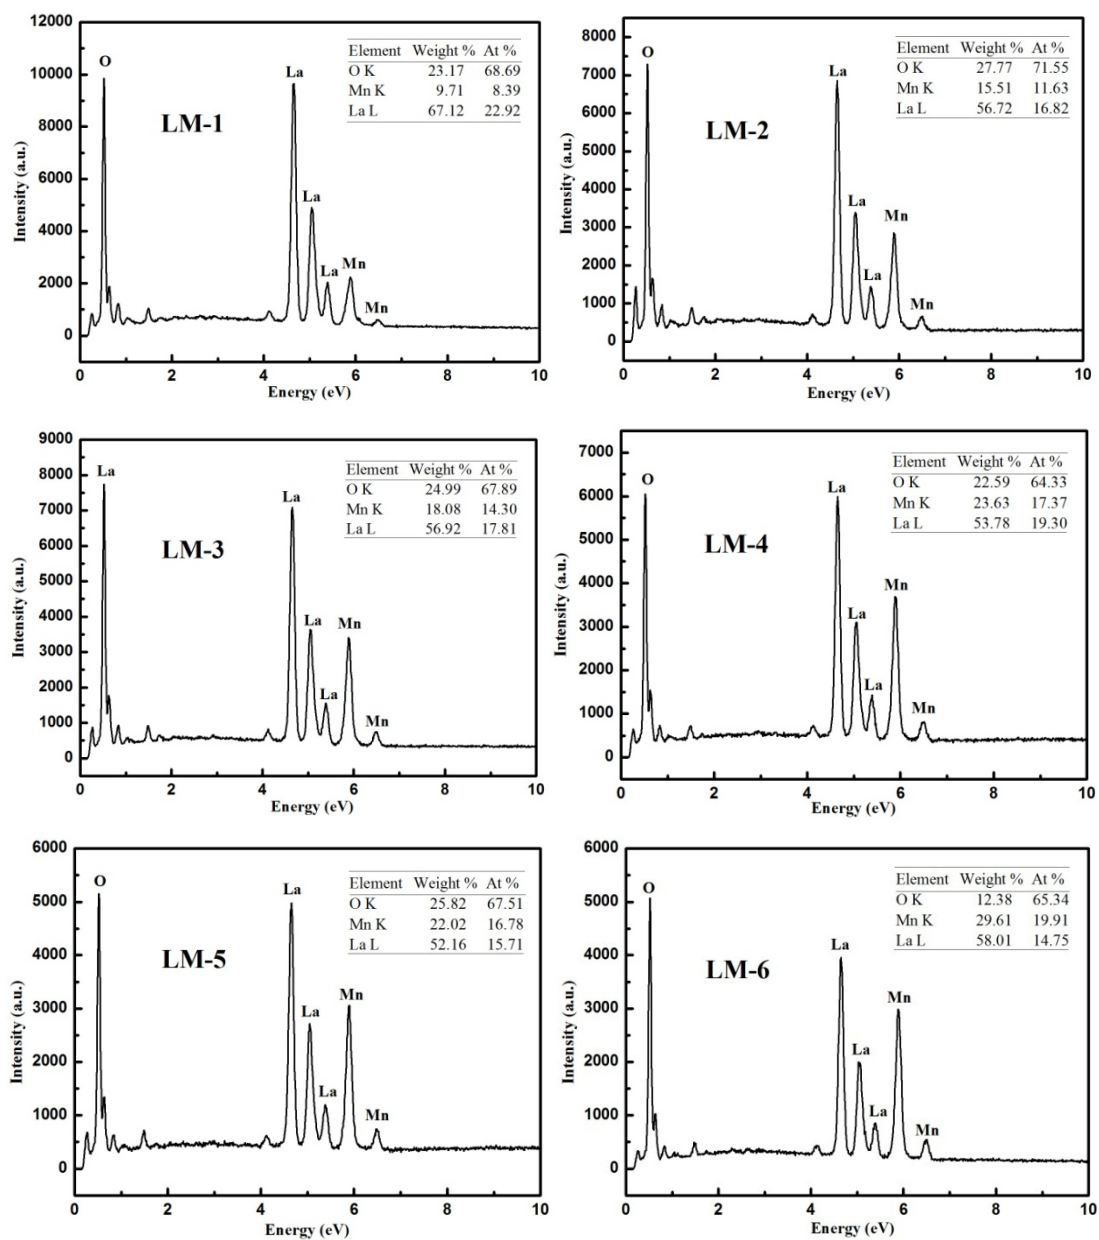

Figure S2. EDX images of LM-1, LM-2, LM-3, LM-4, LM-5 and LM-6

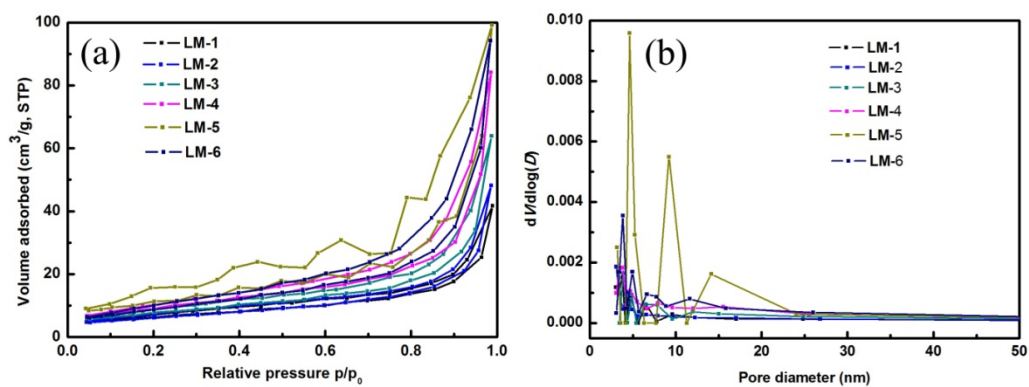

**Figure S3.** Nitrogen adsorption-desorption isotherms (a) and pore-size distributions (b) of  $\text{LaMnO}_3$ .

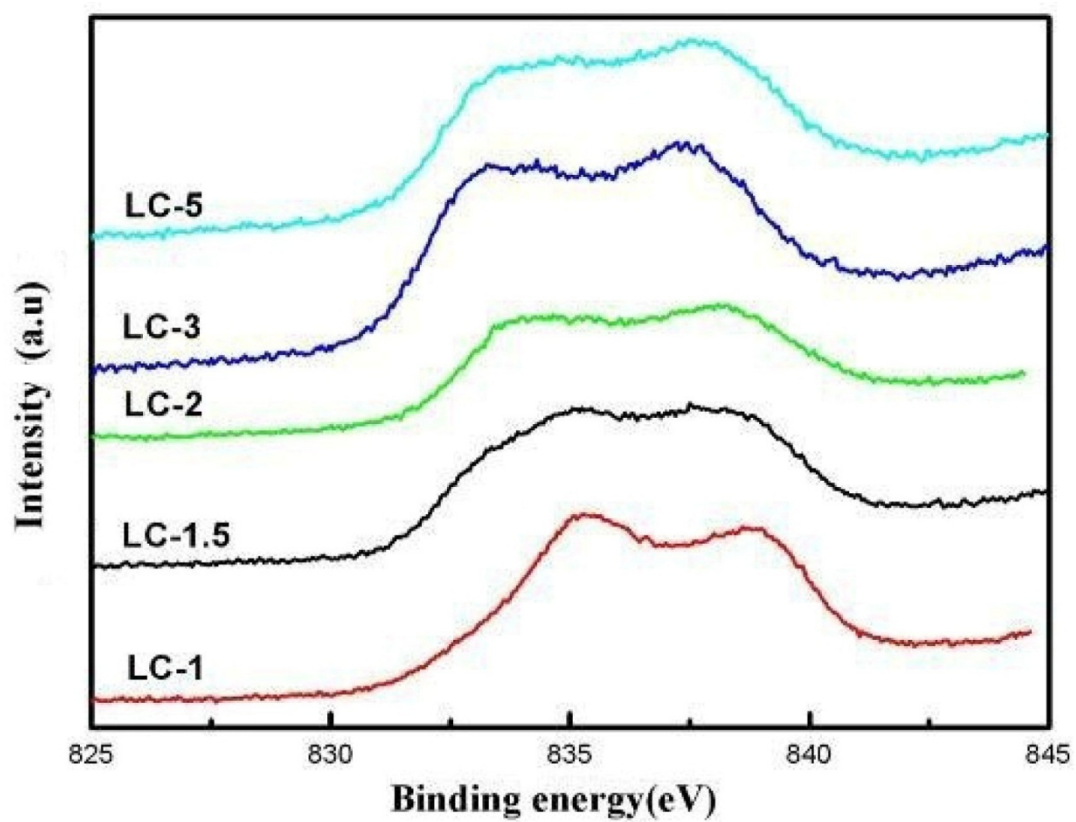

Figure S4. XPS spectra of the as-prepared  $\text{LaCoO}_3$  of  $\text{La}3d_{5/2}$ .

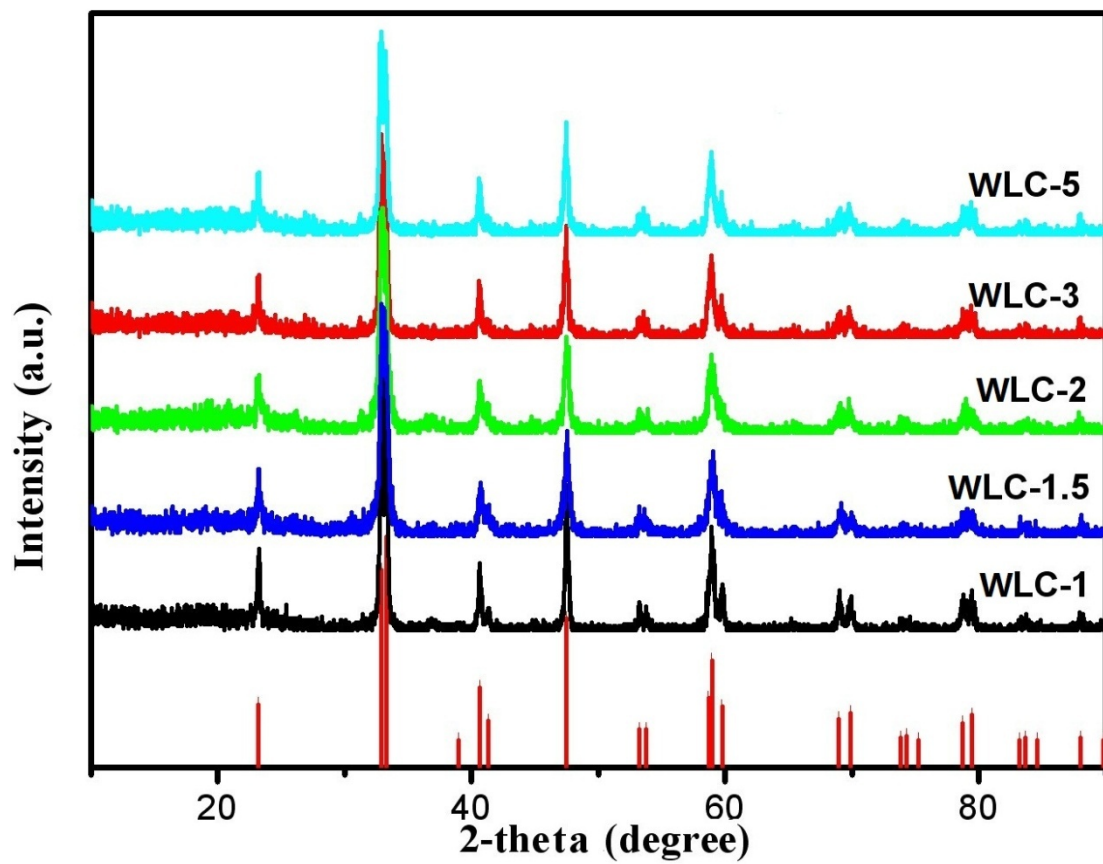

Figure S5. XRD patterns of the acid-treated  $\text{LaCoO}_3$ .

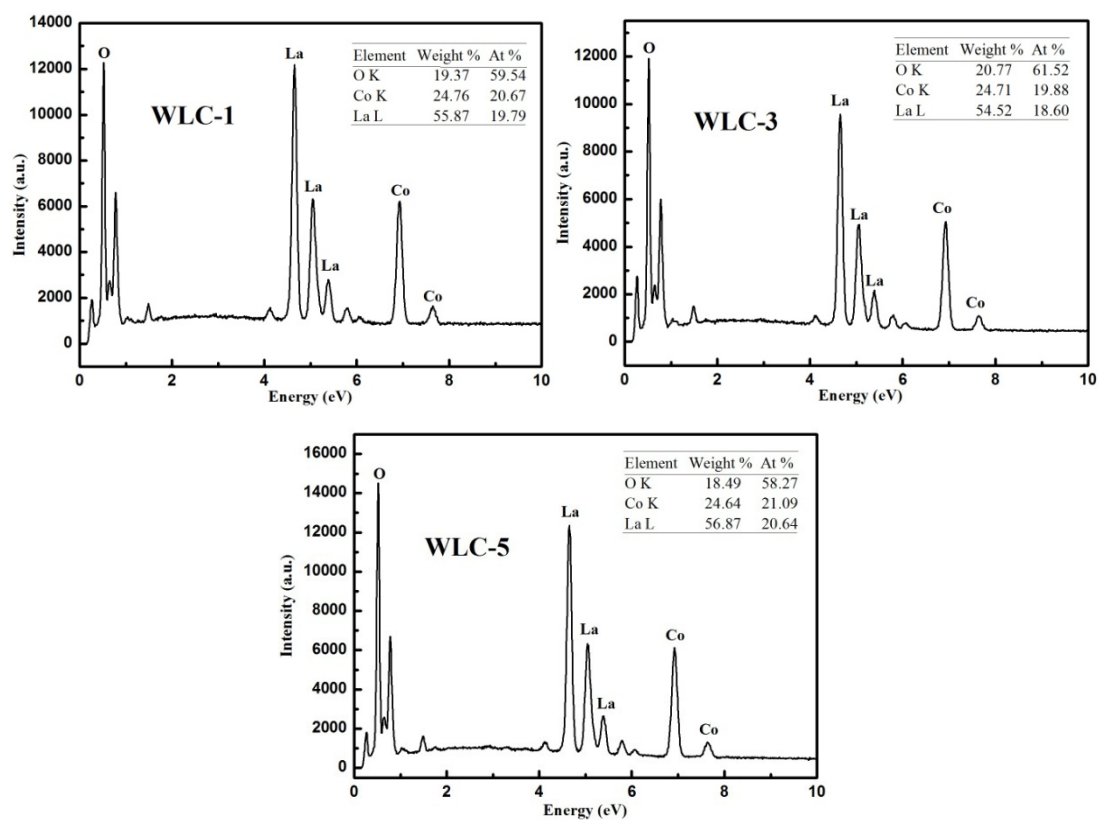

**Figure S6.** EDX images of WLC-1, WLC-3 and WLC-5



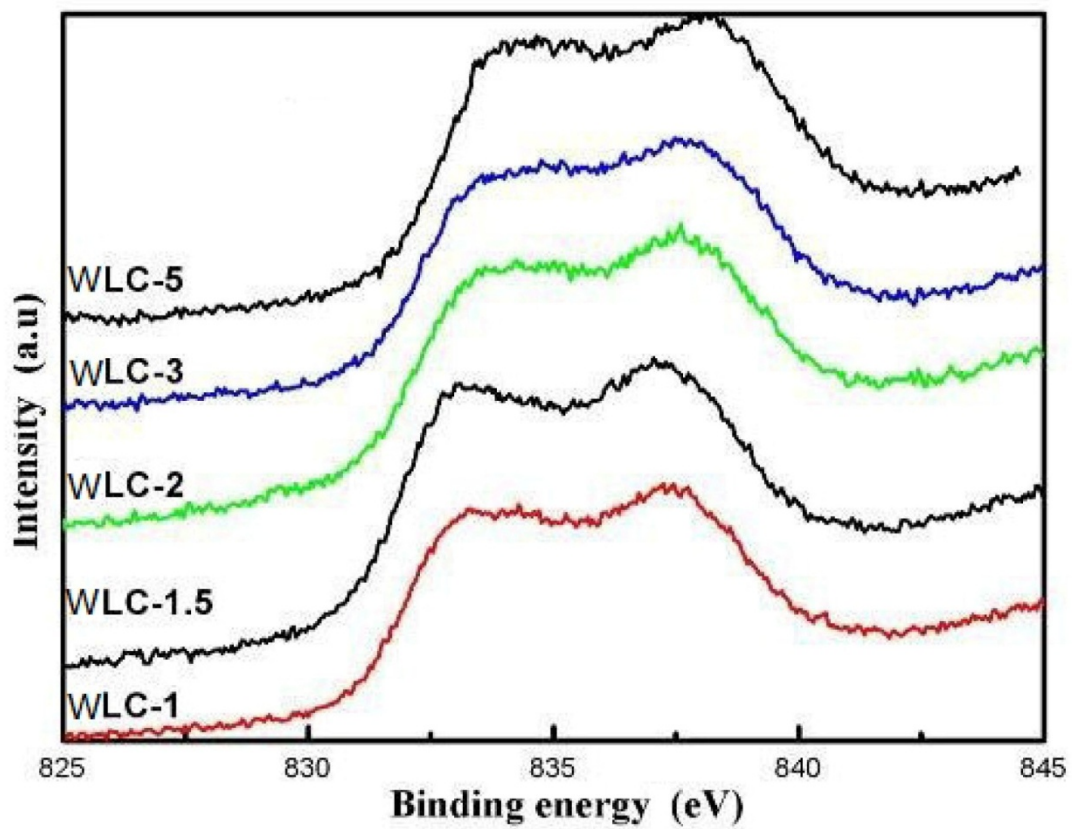

Figure S7. XPS spectra of the acid-treated  $LaCoO_3$  of  $La3d_{5/2}$ .

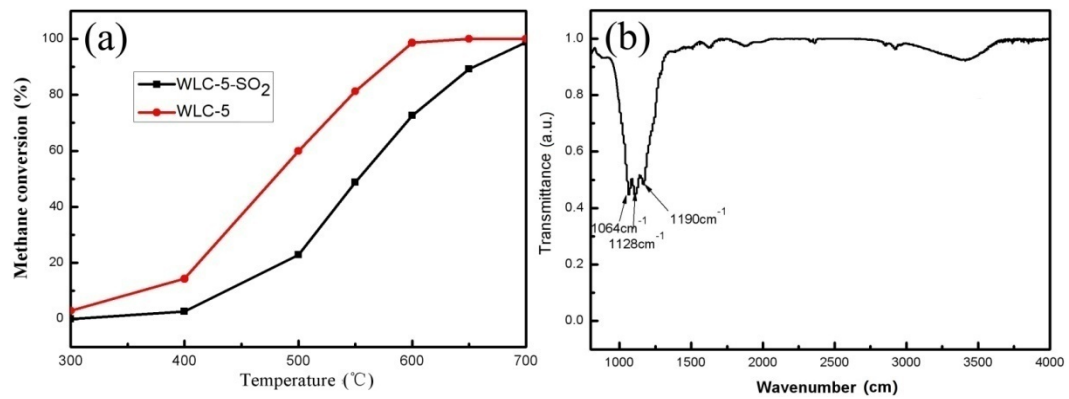

**Figure S8.** CH<sub>4</sub> oxidation as a function of temperature to WLC-5 before and after SO<sub>2</sub> poisoned (a) and FTIR spectrum of the SO<sub>2</sub> poisoned WLC-5 (b)
